# Supplementary material
Source: publisher site journal article supplement (https://www.jstage.jst.go.jp/article/geochemj/49/4/49_2.0381/_supplement/_download/49_2.0381_1.pdf)
Supplement: Supplementary file 1 [file 49_2.0381_1.pdf]

Supplementary Table S1. Summary of river water data

|               | Date     | WT<br>(°C) | pH  | Na<br>(mmol L <sup>-1</sup> ) | K<br>(mmol L <sup>-1</sup> ) | Mg<br>(mmol L <sup>-1</sup> ) | Ca<br>(mmol L <sup>-1</sup> ) | Cl<br>(mmol L <sup>-1</sup> ) | Alkalinity<br>(meq L <sup>-1</sup> ) | SO <sub>4</sub><br>(mmol L <sup>-1</sup> ) | Sr<br>(μmol L <sup>-1</sup> ) | Ba<br>(μmol L <sup>-1</sup> ) | PO <sub>4</sub><br>(μmol L <sup>-1</sup> ) |
|---------------|----------|------------|-----|-------------------------------|------------------------------|-------------------------------|-------------------------------|-------------------------------|--------------------------------------|--------------------------------------------|-------------------------------|-------------------------------|--------------------------------------------|
| Kunigami area |          |            |     |                               |                              |                               |                               |                               |                                      |                                            |                               |                               |                                            |
| Genka-10      | 17/02/12 | 15.8       | 7.2 | 0.683                         | 0.018                        | 0.147                         | 0.212                         | 0.467                         | 0.607                                | 0.065                                      | 0.670                         | 0.039                         | 0.270                                      |
| Genka-20      | 17/02/12 | 15.8       | 7.2 | 0.674                         | 0.019                        | 0.149                         | 0.244                         | 0.643                         | 0.656                                | 0.084                                      | 0.692                         | 0.042                         | 0.278                                      |
|               | 31/03/13 | 18.4       | 6.9 | 0.552                         | 0.023                        | 0.079                         | 0.102                         | 0.592                         | 0.221                                | 0.047                                      | 0.327                         | 0.026                         | 0.258                                      |
| Noha          | 31/03/13 | 18.7       | 7.5 | 0.724                         | 0.042                        | 0.220                         | 0.635                         | 0.852                         | 1.30                                 | 0.105                                      | 0.769                         | 0.025                         | 3.26                                       |
| Benoki        | 31/03/13 | 18.6       | 7.2 | 0.592                         | 0.029                        | 0.098                         | 0.177                         | 0.593                         | 0.396                                | 0.053                                      | 0.597                         | 0.044                         | 0.460                                      |
| Aha           | 01/04/13 | 18.4       | 7.2 | 0.758                         | 0.023                        | 0.116                         | 0.133                         | 0.768                         | 0.375                                | 0.053                                      | 0.545                         | 0.045                         | 0.187                                      |
| Fukuchi       | 01/04/13 | 19.4       | 7.2 | 0.815                         | 0.026                        | 0.133                         | 0.282                         | 0.840                         | 0.686                                | 0.072                                      | 0.761                         | 0.061                         | 0.113                                      |
| Teima         | 01/04/13 | 19.0       | 7.2 | 0.986                         | 0.036                        | 0.127                         | 0.186                         | 0.957                         | 0.449                                | 0.064                                      | 0.563                         | 0.132                         | 0.521                                      |
| Kushi-okawa   | 18/02/12 | 14.9       | 7.3 | 1.25                          | 0.033                        | 0.246                         | 0.474                         | 1.16                          | 1.07                                 | 0.104                                      | 0.998                         | 0.087                         | 0.139                                      |
| Maja          | 02/04/13 | 21.0       | 7.2 | 1.21                          | 0.027                        | 0.185                         | 0.262                         | 1.16                          | 0.622                                | 0.080                                      | 0.740                         | 0.045                         | 0.143                                      |
| Okukubi-10    | 18/02/12 | 13.9       | 7.7 | 1.48                          | 0.044                        | 0.266                         | 0.871                         | 1.13                          | 2.15                                 | 0.111                                      | 2.16                          | 0.120                         | 0.297                                      |
| Okukubi-20    | 18/02/12 | 13.6       | 7.4 | 1.37                          | 0.123                        | 0.268                         | 0.864                         | 1.07                          | 1.95                                 | 0.102                                      | 2.39                          | 0.107                         | 11.2                                       |
|               | 02/04/13 | 24.7       | 7.5 | 1.27                          | 0.085                        | 0.223                         | 0.825                         | 1.18                          | 1.85                                 | 0.110                                      | 1.88                          | 0.114                         | 5.41                                       |
| Motobu area   |          |            |     |                               |                              |                               |                               |                               |                                      |                                            |                               |                               |                                            |
| Yabu-10       | 17/02/12 | 17.2       | 7.5 | 1.27                          | 0.047                        | 0.575                         | 1.78                          | 0.978                         | 4.17                                 | 0.280                                      | 2.57                          | 0.083                         | 1.68                                       |
| Yabu-20       | 17/02/12 | 16.2       | 7.5 | 1.39                          | 0.077                        | 0.484                         | 1.84                          | 1.08                          | 3.78                                 | 0.338                                      | 2.73                          | 0.086                         | 1.66                                       |
|               | 01/04/13 | 20.4       | 7.5 | 1.10                          | 0.071                        | 0.338                         | 1.50                          | 0.978                         | 3.25                                 | 0.260                                      | 2.48                          | 0.092                         | 1.37                                       |
| Oi            | 02/04/13 | 20.7       | 7.8 | 0.769                         | 0.042                        | 0.164                         | 1.55                          | 0.835                         | 3.06                                 | 0.113                                      | 1.12                          | 0.077                         | 1.79                                       |
| Manna         | 02/04/13 | 21.6       | 7.2 | 0.693                         | 0.033                        | 0.204                         | 1.55                          | 0.836                         | 3.20                                 | 0.098                                      | 0.960                         | 0.086                         | 1.30                                       |

(Continued)

Shimajiri area

|           |          |      |     |       |       |       |       |       |      |       |      |       |       |
|-----------|----------|------|-----|-------|-------|-------|-------|-------|------|-------|------|-------|-------|
| Tengan    | 02/04/13 | 22.2 | 7.3 | 1.02  | 0.045 | 0.217 | 1.09  | 1.03  | 1.97 | 0.206 | 1.21 | 0.050 | 0.723 |
| Hija-10   | 19/02/12 | 12.9 | 7.7 | 3.31  | 0.158 | 0.576 | 1.92  | 2.58  | 4.72 | 0.435 | 4.07 | 0.118 | 9.90  |
| Hija-20   | 19/02/12 | 15.6 | 7.3 | 2.57  | 0.116 | 0.459 | 2.48  | 1.97  | 5.17 | 0.485 | 3.45 | 0.150 | 10.3  |
| Hija-30   | 19/02/12 | 16.2 | 7.8 | 1.22  | 0.109 | 0.307 | 2.22  | 1.26  | 4.50 | 0.305 | 2.12 | 0.117 | 4.32  |
|           | 03/04/13 | 20.8 | 7.9 | 1.32  | 0.088 | 0.257 | 1.73  | 1.08  | 3.36 | 0.260 | 1.82 | 0.093 | 2.92  |
|           | 20/04/14 | 23.3 | 7.6 | 1.63  | 0.142 | 0.300 | 2.46  | 2.11  | 4.62 | 0.204 | 2.08 | 0.114 | 2.69  |
|           | 10/06/14 | 23.8 | 7.6 | 0.667 | 0.132 | 0.158 | 0.878 | 0.621 | 2.07 | 0.232 | 1.29 | 0.060 | 1.52  |
| Futenma   | 03/04/13 | 18.7 | 8.0 | 2.26  | 0.156 | 0.928 | 3.03  | 1.62  | 7.47 | 1.15  | 7.45 | 0.188 | 9.16  |
|           | 20/04/14 | 21.7 | 7.6 | 2.94  | 0.170 | 0.766 | 2.64  | 2.21  | 5.49 | 1.10  | 5.66 | 0.156 | 23.2  |
|           | 09/06/14 | 23.4 | 7.9 | 2.38  | 0.160 | 0.865 | 2.87  | 1.45  | 5.95 | 1.23  | 6.67 | 0.175 | 8.17  |
| Asato     | 03/04/13 | 19.7 | 7.8 | 3.24  | 0.229 | 1.02  | 2.54  | 1.51  | 6.19 | 1.12  | 7.67 | 0.236 | 15.3  |
|           | 20/04/14 | 20.6 | 7.8 | 3.54  | 0.213 | 0.916 | 2.38  | 1.61  | 6.43 | 1.07  | 6.76 | 0.252 | 19.9  |
|           | 09/06/14 | 23.6 | 7.9 | 3.61  | 0.243 | 1.09  | 2.73  | 1.46  | 7.05 | 1.18  | 7.95 | 0.253 | 10.7  |
| Kokuba-10 | 19/02/12 | 15.2 | 7.9 | 2.79  | 0.152 | 1.18  | 2.90  | 1.16  | 6.93 | 1.25  | 7.63 | 0.165 | 1.94  |
|           | 03/04/13 | 20.6 | 8.1 | 3.20  | 0.161 | 0.732 | 1.53  | 1.24  | 4.71 | 0.779 | 4.34 | 0.095 | 1.24  |
|           | 19/04/14 | 22.9 | 8.2 | 2.63  | 0.127 | 1.14  | 2.54  | 1.59  | 6.02 | 1.79  | 6.95 | 0.120 | 1.21  |
|           | 09/06/14 | 25.6 | 7.9 | 2.79  | 0.166 | 0.843 | 1.80  | 1.03  | 5.15 | 0.997 | 4.95 | 0.136 | 1.55  |
| Kokuba-20 | 19/02/12 | 14.6 | 7.5 | 6.22  | 0.682 | 0.904 | 1.84  | 3.23  | 4.96 | 1.26  | 5.71 | 0.237 | 26.1  |
| Kokuba-30 | 19/02/12 | 14.3 | 7.6 | 4.00  | 0.369 | 0.886 | 1.81  | 2.15  | 4.96 | 0.879 | 5.23 | 0.145 | 22.7  |
| Mukue     | 03/04/13 | 19.3 | 7.9 | 1.86  | 0.186 | 1.35  | 3.50  | 1.30  | 6.73 | 1.64  | 8.95 | 0.164 | 2.77  |
|           | 19/04/14 | 25.8 | 8.4 | 2.13  | 0.245 | 1.15  | 2.58  | 1.50  | 5.16 | 1.65  | 6.75 | 0.093 | 10.3  |
|           | 09/06/14 | 24.5 | 7.8 | 1.89  | 0.253 | 1.20  | 3.21  | 1.43  | 6.40 | 1.62  | 7.57 | 0.144 | 2.64  |
